# Supplementary material for: Continuous assessment of the adaptability between river network connectivity and water security in a typical highly urbanized area in eastern China
Source: Frontiers journal article supplement (doi:10.3389/fenvs.2022.932376), 2022-08-12
Supplement: Data_Sheet_1.XLSX [file Data_Sheet_1.XLSX]

## Sheet: In total
State layer	Attribute layer	Basic indicators	Data material	Alternative indicators
River network connectivity	River network structure	Water surface rate	30m LUCC data from the Institute of Geographic Science and Natural Resources Research	River network density
	Connectivity	Hydrological connectivity	hydrological yearbooks of the Yangtze River basin from 2010 to 2019	Network connection degree
		The coverage rate of suitable flow velocity of the representative station	hydrological yearbooks of the Yangtze River basin from 2010 to 2019
Water security	Safety of flood control and waterlogging elimination	Regional flood control capacity	the government work report	Drainage modules suitability
	Water ecological environment safety	Water qualification rate	2010-2019 water quality data from Jiangsu Province Hydrology Bureau and Jiangsu Provincial Academy of Environmental Science	Biodiversity
	Water supply safety	Probability of water level	hydrological yearbooks of the Yangtze River basin from 2010 to 2019	Probability of water supply
						Score
					Year	2010	2011	2012	2013	2014	2015	2016	2017	2018	2019
					Water surface rate	50.48	49.57	48.66	47.75	46.84	45.93	44.1467	42.3633	40.58	40.215
					Hydrological connectivity	90	94	92	91	95	87	90	91	91	93
					The coverage rate of suitable flow velocity of the representative station	68.3	74.1	64.4	56.9	67.5	62.7	60.9	57.6	52.2	50.9
					Regional flood control capacity	60	60	60	60	60	60	60	70	70	80
					Water qualification rate	40.2	39.4	31.1	34.8	29.9	27.5	30.4	42	47.5	66.7
					Probability of water level	100	100	100	100	100	100	100	100	100	100
						Value of Index
					Year	2010	2011	2012	2013	2014	2015	2016	2017	2018	2019
					Water surface rate	0.045895	0.0456	0.0453	0.0451	0.0448	0.0445081	0.044	0.0434	0.0428764	0.0428
					Hydrological connectivity	0.895318	0.939915	0.923195	0.907649	0.949763	0.867339	0.90255	0.912364	0.912548	0.92996
					The coverage rate of suitable flow velocity of the representative station	0.483425	0.541436	0.443681	0.368785	0.475138	0.426796	0.409341	0.375691	0.321823	0.309392
					Regional flood control capacity	60	60	60	60	60	60	60	70	70	80
					Water qualification rate	0.401709	0.393939	0.310606	0.348485	0.29927	0.275362	0.304348	0.42029	0.475177	0.666667
					Probability of water level	1	1	1	1	1	1	1	1	1	1
						Score-In total
					Year	2010	2011	2012	2013	2014	2015	2016	2017	2018	2019
					Water surface rate	50.48	49.57	48.66	47.75	46.84	45.93	44.1467	42.3633	40.58	40.215
					Hydrological connectivity	90	94	92	91	95	87	90	91	91	93
					The coverage rate of suitable flow velocity of the representative station	68.3	74.1	64.4	56.9	67.5	62.7	60.9	57.6	52.2	50.9
					River network connectivity	0.695933	0.725567	0.683533	0.652167	0.6978	0.6521	0.650156	0.636544	0.6126	0.613717
					Regional flood control capacity	60	60	60	60	60	60	60	70	70	80
					Water qualification rate	40.2	39.4	31.1	34.8	29.9	27.5	30.4	42	47.5	66.7
					Probability of water level	100	100	100	100	100	100	100	100	100	100
					Wtaer security	0.667333	0.664667	0.637	0.649333	0.633	0.625	0.634667	0.706667	0.725	0.822333
					C	0.464215	0.481335	0.43487	0.423472	0.44066	0.407379	0.412572	0.448599	0.440999	0.494029
					T	0.825611	0.833737	0.812568	0.806691	0.815721	0.799093	0.801506	0.819515	0.817802	0.847364
					D	61.9081	63.3487	59.4442	58.4475	59.9546	57.0556	57.5047	60.6328	60.0541	64.701
					Year	2010	2011	2012	2013	2014	2015	2016	2017	2018	2019
					C	0.493741	0.509851	0.462267	0.452227	0.46712	0.434108	0.439782	0.480596	0.47434	0.533525
					T	0.83943	0.847349	0.826438	0.820569	0.829357	0.812902	0.815169	0.832766	0.830935	0.860039
					D	0.619081	0.633487	0.594442	0.584475	0.599546	0.570556	0.575047	0.606328	0.600541	0.64701

## Sheet: Water surface rate
Year	Water Surface rate	Score						2010	globe30					2020	globe30								Year	globe30	CNLUCC	Xu, et al., 2018; Wang, et al., 2016	Liu, eta al., 2021
1960	0.061							OBJECTID *	Value	Count				OBJECTID *	Value	Count							1980			0.056	0.0559
2010	0.045895	50.4755						1	60	15860812				1	60	22198969							2010	0.04703	0.045895	0.046	0.0366
2015	0.0445081	45.9283						2	85	2471353				2	87	2296291							2015		0.0445081
2018	0.0428764	40.5784						3	150	100428				3	150	76822							2018		0.0428764
2020	0.0426538	39.8485						4	165	11986				4	165	4855							2020	0.0437	0.0426538
								5	180	777228				5	180	405974
								6	195	166				6	240	1353014
								7	225	320496				7	255	26212315
								8	255	33005771						52548240	0.0436987
										52548240	0.0470302
								2010	CNLUCC				2015	CNLUCC					2018	CNLUCC				2020	CNLUCC
								OBJECTID *	Value	Count			OBJECTID *	Value	Count				OBJECTID *	Value	Count			OBJECTID *	Value	Count
								1	11	2254612			1	11	2193883				1	11	233468			1	11	2119799
								2	12	69433			2	12	60744				2	12	1970370			2	12	58631
								3	21	97332			3	21	97372				3	21	97321			3	21	97362
								4	22	8543			4	22	8568				4	22	8571			4	22	8571
								5	23	15263			5	23	15223				5	23	15270			5	23	15271
								6	24	3433			6	24	3453				6	24	3447			6	24	3447
								7	31	11145			8	31	11145				7	31	20035			7	31	20105
								8	41	23885			13	41	23888				8	41	17314			8	41	17402
								9	42	28627			14	42	28628				9	42	33776			9	42	28639
								10	43	133487			15	43	127131				10	43	130553			10	43	129762
								11	46	23192			18	46	23223				11	46	13791			11	46	18615
								12	51	1309197			20	51	1375595				12	51	1416711			12	51	1415076
								13	52	545180			21	52	554343				13	52	560121			13	52	584285
								14	53	27711			22	53	29349				14	53	31837			14	53	35588
								15	55	1504	2324045	0.509879	29	65	2548	2254627	0.494648		15	65	2553	2203838	0.483502	15	65	2553	2178430	0.477931
								16	65	2548	124571	0.02733	30	66	2950	124616	0.0273398		16	66	2940	124609	0.0273381	16	66	2940	124651	0.0273475
								17	66	2939	11145	0.00244513				11145	0.00244513					20035	0.00439549				20105	0.00441088
										4558031	209191	0.045895			4558043	202870	0.0445081				4558078	195434	0.0428764			4558046	194418	0.0426538
											1883592	0.413247				1959287	0.429853					2008669	0.440683				2034949	0.446452
											5487	0.00120381				2950	0.000647208					2940	0.000645009				2940	0.000645013
										2010	2015	2018	2020
									Cultivated land	0.509879	0.494648	0.483502	0.477931
									Forest	0.02733	0.0273398	0.0273381	0.0273475
									Grassland	0.00244513	0.00244513	0.00439549	0.00441088
									Water surface	0.045895	0.0445081	0.0428764	0.0426538
									Urban land	0.413247	0.429853	0.440683	0.446452
									Unexploited	0.00120381	0.000647208	0.000645009	0.000645013

## Sheet: Hydrological connectivity
Year	Hydrological connectivity	Score			2010	0.895318		Year	Hydrological connectivity
2010	0.895318	90			1	0.875912		2010	0.895318
2011	0.939915	94			2	0.934579		2011	0.939915
2012	0.923195	92			3	0.852273		2012	0.923195
2013	0.907649	91			4	0.825309		2013	0.907649
2014	0.949763	95			11	0.940439		2014	0.949763
2015	0.867339	87			12	0.943396		2015	0.867339
2016	0.90255	90			2011	0.939915		2016	0.90255
2017	0.912364	91			1	0.928793		2017	0.912364
2018	0.912548	91			2	0.934579		2018	0.912548
2019	0.92996	93			3	0.89153		2019	0.92996
					4	0.934579
					11	0.988468
					12	0.961538
					2012	0.923195
					1	0.940439
					2	0.955414
					3	0.865801
					4	0.84507
					11	0.972447
					12	0.96
					2013	0.907649
					1	0.950872
					2	0.947867
					3	0.865801
					4	0.84507
					11	0.851064
					12	0.985222
					2014	0.949763
					1	0.946372
					2	0.998336
					3	0.956938
					4	0.882353
					11	0.97561
					12	0.938967
					2015	0.867339
					1	0.904977
					2	0.909091
					3	0.869565
					4	0.794702
					11	0.874636
					12	0.851064
					2016	0.90255
					1	0.983607
					2	0.991736
					3	0.847458
					4	0.859599
					11	0.760456
					12	0.972447
					2017	0.912364
					1	0.944882
					2	0.864553
					3	0.84507
					4	0.977199
					11	0.9375
					12	0.904977
					2018	0.912548
					1	0.888889
					2	0.906344
					3	0.918836
					4	0.868307
					11	0.9375
					12	0.955414
					2019	0.92996
					1	0.995025
					2	0.933126
					3	0.872093
					4	0.988468
					11	0.896861
					12	0.894188

## Sheet: The coverage rate of suitable f
Year	The coverage rate of suitable flow velocity of the representative station	Score		flow velocity>0.05
2010	0.483425	68.3		0.791436					Monitoring point	number of records of suitable flow velocity	proportion	1812 in total
2011	0.541436	74.1		0.80663					Huangnianqiao	133	0.0733996
2012	0.443681	64.4		0.725275					Caoqiao	1211	0.668322
2013	0.368785	56.9		0.584254					Luoshe	924	0.509934
2014	0.475138	67.5		0.779006					Wangting	688	0.379691
2015	0.426796	62.7		0.707182
2016	0.409341	60.9		0.701923				non-flood season days	Year	Huangnianqiao	Caoqiao	Luoshe	Wangting
2017	0.375691	57.6		0.645028				181	2010	27	117	151	55
2018	0.321823	52.2		0.573204				181	2011	14	164	79	135
2019	0.309392	50.9		0.679558				182	2012	15	157	69	82
								181	2013	27	154	42	44
								181	2014	9	133	101	101
								181	2015	12	137	93	67
								182	2016	19	135	111	33
								181	2017	5	127	106	34
								181	2018	1	87	71	74
								181	2019	4		101	63
								proportion
								non-flood season days	Year	Huangnianqiao	Caoqiao	Luoshe	Wangting	Average
								181	2010	0.149171	0.646409	0.834254	0.303867	0.483425
								181	2011	0.0773481	0.906077	0.436464	0.745856	0.541436
								182	2012	0.0824176	0.862637	0.379121	0.450549	0.443681
								181	2013	0.149171	0.850829	0.232044	0.243094	0.368785
								181	2014	0.0497238	0.734807	0.558011	0.558011	0.475138
								181	2015	0.0662983	0.756906	0.513812	0.370166	0.426796
								182	2016	0.104396	0.741758	0.60989	0.181319	0.409341
								181	2017	0.0276243	0.701657	0.585635	0.187845	0.375691
								181	2018	0.00552486	0.480663	0.392265	0.40884	0.321823
								181	2019	0.0220994		0.558011	0.348066	0.309392

## Sheet: Regional flood control capacity
Year	Flood control capacity	score
2010	20-year event	60
2011		60
2012		60
2013		60
2014		60
2015		60
2016	20-year event	60
2017		70
2018		70
2019	30-year event	80

## Sheet: Water qualification rate
Year	Water qualification rate	Score			Date	number of records	number of records over standard	Sum of G	Sum of H		year	number of records	number of records over standard	Water qualification rate
2010	0.401709	40.2			2010-01	11	4	117	47		2010	117	47	0.401709
2011	0.393939	39.4			2010-02	7	5				2011	132	52	0.393939
2012	0.310606	31.1			2010-03	12	1				2012	132	41	0.310606
2013	0.348485	34.8			2010-04	7	2				2013	132	46	0.348485
2014	0.29927	29.9			2010-05	12	3				2014	137	41	0.29927
2015	0.275362	27.5			2010-06	9	4				2015	138	38	0.275362
2016	0.304348	30.4			2010-07	12	2				2016	138	42	0.304348
2017	0.42029	42			2010-08	7	5				2017	138	58	0.42029
2018	0.475177	47.5			2010-09	12	7				2018	141	67	0.475177
2019	0.666667	66.7			2010-10	7	6				2019	144	96	0.666667
					2010-11	12	3
					2010-12	9	5
					2011-01	12	4	132	52
					2011-02	10	5
					2011-03	12	5
					2011-04	10	5
					2011-05	12	6
					2011-06	10	4
					2011-07	12	2
					2011-08	10	2
					2011-09	12	3
					2011-10	10	6
					2011-11	12	4
					2011-12	10	6
					2012-01	12	5	132	41
					2012-02	10	5
					2012-03	12	3
					2012-04	10	2
					2012-05	12	3
					2012-06	10	4
					2012-07	12	2
					2012-08	10	3
					2012-09	12	2
					2012-10	10	6
					2012-11	12	3
					2012-12	10	3
					2013-01	12	3	132	46
					2013-02	10	3
					2013-03	12	2
					2013-04	10	3
					2013-05	12	6
					2013-06	10	4
					2013-07	12	3
					2013-08	10	4
					2013-09	12	5
					2013-10	10	3
					2013-11	12	5
					2013-12	10	5
					2014-01	12	2	137	41
					2014-02	10	4
					2014-03	12	4
					2014-04	11	2
					2014-05	12	3
					2014-06	11	2
					2014-07	12	2
					2014-08	11	3
					2014-09	12	2
					2014-10	11	6
					2014-11	12	6
					2014-12	11	5
					2015-01	12	5	138	38
					2015-02	11	5
					2015-03	12	4
					2015-04	11	4
					2015-05	12	3
					2015-06	11	1
					2015-07	12	2
					2015-08	11	1
					2015-09	12	4
					2015-10	11	2
					2015-11	12	5
					2015-12	11	2
					2016-01	12	2	138	42
					2016-02	11	5
					2016-03	12	5
					2016-04	11	2
					2016-05	12	5
					2016-06	11	1
					2016-07	12	3
					2016-08	11	4
					2016-09	12	7
					2016-10	11	2
					2016-11	12	2
					2016-12	11	4
					2017-01	12	2	138	58
					2017-02	11	4
					2017-03	12	7
					2017-04	11	4
					2017-05	12	5
					2017-06	11	5
					2017-07	12	3
					2017-08	11	4
					2017-09	12	6
					2017-10	11	6
					2017-11	12	6
					2017-12	11	6
					2018-01	12	6	141	67
					2018-02	11	6
					2018-03	12	4
					2018-04	11	4
					2018-05	12	6
					2018-06	11	6
					2018-07	12	4
					2018-08	12	5
					2018-09	12	5
					2018-10	12	7
					2018-11	12	8
					2018-12	12	6
					2019-01	12	8	144	96
					2019-02	12	7
					2019-03	12	7
					2019-04	12	7
					2019-05	12	9
					2019-06	12	10
					2019-07	12	9
					2019-08	12	8
					2019-09	12	8
					2019-10	12	8
					2019-11	12	8
					2019-12	12	7

## Sheet: Probability of water level
Year	Probability of water level	Score		Time	Water level over standars of Changzhou	Water level over standars of Wuxi	Water level over standars of Qingyang	1 satisfied	0 unsatisfied
2010	1	100		2010-01-01	1	1	1
2011	1	100		2010-01-02	1	1	1
2012	1	100		2010-01-03	1	1	1
2013	1	100		2010-01-04	1	1	1
2014	1	100		2010-01-05	1	1	1
2015	1	100		2010-01-06	1	1	1
2016	1	100		2010-01-07	1	1	1
2017	1	100		2010-01-08	1	1	1
2018	1	100		2010-01-09	1	1	1
2019	1	100		2010-01-10	1	1	1
				2010-01-11	1	1	1
				2010-01-12	1	1	1
				2010-01-13	1	1	1
				2010-01-14	1	1	1
				2010-01-15	1	1	1
				2010-01-16	1	1	1
				2010-01-17	1	1	1
				2010-01-18	1	1	1
				2010-01-19	1	1	1
				2010-01-20	1	1	1
				2010-01-21	1	1	1
				2010-01-22	1	1	1
				2010-01-23	1	1	1
				2010-01-24	1	1	1
				2010-01-25	1	1	1
				2010-01-26	1	1	1
				2010-01-27	1	1	1
				2010-01-28	1	1	1
				2010-01-29	1	1	1
				2010-01-30	1	1	1
				2010-01-31	1	1	1
				2010-02-01	1	1	1
				2010-02-02	1	1	1
				2010-02-03	1	1	1
				2010-02-04	1	1	1
				2010-02-05	1	1	1
				2010-02-06	1	1	1
				2010-02-07	1	1	1
				2010-02-08	1	1	1
				2010-02-09	1	1	1
				2010-02-10	1	1	1
				2010-02-11	1	1	1
				2010-02-12	1	1	1
				2010-02-13	1	1	1
				2010-02-14	1	1	1
				2010-02-15	1	1	1
				2010-02-16	1	1	1
				2010-02-17	1	1	1
				2010-02-18	1	1	1
				2010-02-19	1	1	1
				2010-02-20	1	1	1
				2010-02-21	1	1	1
				2010-02-22	1	1	1
				2010-02-23	1	1	1
				2010-02-24	1	1	1
				2010-02-25	1	1	1
				2010-02-26	1	1	1
				2010-02-27	1	1	1
				2010-02-28	1	1	1
				2010-03-01	1	1	1
				2010-03-02	1	1	1
				2010-03-03	1	1	1
				2010-03-04	1	1	1
				2010-03-05	1	1	1
				2010-03-06	1	1	1
				2010-03-07	1	1	1
				2010-03-08	1	1	1
				2010-03-09	1	1	1
				2010-03-10	1	1	1
				2010-03-11	1	1	1
				2010-03-12	1	1	1
				2010-03-13	1	1	1
				2010-03-14	1	1	1
				2010-03-15	1	1	1
				2010-03-16	1	1	1
				2010-03-17	1	1	1
				2010-03-18	1	1	1
				2010-03-19	1	1	1
				2010-03-20	1	1	1
				2010-03-21	1	1	1
				2010-03-22	1	1	1
				2010-03-23	1	1	1
				2010-03-24	1	1	1
				2010-03-25	1	1	1
				2010-03-26	1	1	1
				2010-03-27	1	1	1
				2010-03-28	1	1	1
				2010-03-29	1	1	1
				2010-03-30	1	1	1
				2010-03-31	1	1	1
				2010-04-01	1	1	1
				2010-04-02	1	1	1
				2010-04-03	1	1	1
				2010-04-04	1	1	1
				2010-04-05	1	1	1
				2010-04-06	1	1	1
				2010-04-07	1	1	1
				2010-04-08	1	1	1
				2010-04-09	1	1	1
				2010-04-10	1	1	1
				2010-04-11	1	1	1
				2010-04-12	1	1	1
				2010-04-13	1	1	1
				2010-04-14	1	1	1
				2010-04-15	1	1	1
				2010-04-16	1	1	1
				2010-04-17	1	1	1
				2010-04-18	1	1	1
				2010-04-19	1	1	1
				2010-04-20	1	1	1
				2010-04-21	1	1	1
				2010-04-22	1	1	1
				2010-04-23	1	1	1
				2010-04-24	1	1	1
				2010-04-25	1	1	1
				2010-04-26	1	1	1
				2010-04-27	1	1	1
				2010-04-28	1	1	1
				2010-04-29	1	1	1
				2010-04-30	1	1	1
				2010-05-01	1	1	1
				2010-05-02	1	1	1
				2010-05-03	1	1	1
				2010-05-04	1	1	1
				2010-05-05	1	1	1
				2010-05-06	1	1	1
				2010-05-07	1	1	1
				2010-05-08	1	1	1
				2010-05-09	1	1	1
				2010-05-10	1	1	1
				2010-05-11	1	1	1
				2010-05-12	1	1	1
				2010-05-13	1	1	1
				2010-05-14	1	1	1
				2010-05-15	1	1	1
				2010-05-16	1	1	1
				2010-05-17	1	1	1
				2010-05-18	1	1	1
				2010-05-19	1	1	1
				2010-05-20	1	1	1
				2010-05-21	1	1	1
				2010-05-22	1	1	1
				2010-05-23	1	1	1
				2010-05-24	1	1	1
				2010-05-25	1	1	1
				2010-05-26	1	1	1
				2010-05-27	1	1	1
				2010-05-28	1	1	1
				2010-05-29	1	1	1
				2010-05-30	1	1	1
				2010-05-31	1	1	1
				2010-06-01	1	1	1
				2010-06-02	1	1	1
				2010-06-03	1	1	1
				2010-06-04	1	1	1
				2010-06-05	1	1	1
				2010-06-06	1	1	1
				2010-06-07	1	1	1
				2010-06-08	1	1	1
				2010-06-09	1	1	1
				2010-06-10	1	1	1
				2010-06-11	1	1	1
				2010-06-12	1	1	1
				2010-06-13	1	1	1
				2010-06-14	1	1	1
				2010-06-15	1	1	1
				2010-06-16	1	1	1
				2010-06-17	1	1	1
				2010-06-18	1	1	1
				2010-06-19	1	1	1
				2010-06-20	1	1	1
				2010-06-21	1	1	1
				2010-06-22	1	1	1
				2010-06-23	1	1	1
				2010-06-24	1	1	1
				2010-06-25	1	1	1
				2010-06-26	1	1	1
				2010-06-27	1	1	1
				2010-06-28	1	1	1
				2010-06-29	1	1	1
				2010-06-30	1	1	1
				2010-07-01	1	1	1
				2010-07-02	1	1	1
				2010-07-03	1	1	1
				2010-07-04	1	1	1
				2010-07-05	1	1	1
				2010-07-06	1	1	1
				2010-07-07	1	1	1
				2010-07-08	1	1	1
				2010-07-09	1	1	1
				2010-07-10	1	1	1
				2010-07-11	1	1	1
				2010-07-12	1	1	1
				2010-07-13	1	1	1
				2010-07-14	1	1	1
				2010-07-15	1	1	1
				2010-07-16	1	1	1
				2010-07-17	1	1	1
				2010-07-18	1	1	1
				2010-07-19	1	1	1
				2010-07-20	1	1	1
				2010-07-21	1	1	1
				2010-07-22	1	1	1
				2010-07-23	1	1	1
				2010-07-24	1	1	1
				2010-07-25	1	1	1
				2010-07-26	1	1	1
				2010-07-27	1	1	1
				2010-07-28	1	1	1
				2010-07-29	1	1	1
				2010-07-30	1	1	1
				2010-07-31	1	1	1
				2010-08-01	1	1	1
				2010-08-02	1	1	1
				2010-08-03	1	1	1
				2010-08-04	1	1	1
				2010-08-05	1	1	1
				2010-08-06	1	1	1
				2010-08-07	1	1	1
				2010-08-08	1	1	1
				2010-08-09	1	1	1
				2010-08-10	1	1	1
				2010-08-11	1	1	1
				2010-08-12	1	1	1
				2010-08-13	1	1	1
				2010-08-14	1	1	1
				2010-08-15	1	1	1
				2010-08-16	1	1	1
				2010-08-17	1	1	1
				2010-08-18	1	1	1
				2010-08-19	1	1	1
				2010-08-20	1	1	1
				2010-08-21	1	1	1
				2010-08-22	1	1	1
				2010-08-23	1	1	1
				2010-08-24	1	1	1
				2010-08-25	1	1	1
				2010-08-26	1	1	1
				2010-08-27	1	1	1
				2010-08-28	1	1	1
				2010-08-29	1	1	1
				2010-08-30	1	1	1
				2010-08-31	1	1	1
				2010-09-01	1	1	1
				2010-09-02	1	1	1
				2010-09-03	1	1	1
				2010-09-04	1	1	1
				2010-09-05	1	1	1
				2010-09-06	1	1	1
				2010-09-07	1	1	1
				2010-09-08	1	1	1
				2010-09-09	1	1	1
				2010-09-10	1	1	1
				2010-09-11	1	1	1
				2010-09-12	1	1	1
				2010-09-13	1	1	1
				2010-09-14	1	1	1
				2010-09-15	1	1	1
				2010-09-16	1	1	1
				2010-09-17	1	1	1
				2010-09-18	1	1	1
				2010-09-19	1	1	1
				2010-09-20	1	1	1
				2010-09-21	1	1	1
				2010-09-22	1	1	1
				2010-09-23	1	1	1
				2010-09-24	1	1	1
				2010-09-25	1	1	1
				2010-09-26	1	1	1
				2010-09-27	1	1	1
				2010-09-28	1	1	1
				2010-09-29	1	1	1
				2010-09-30	1	1	1
				2010-10-01	1	1	1
				2010-10-02	1	1	1
				2010-10-03	1	1	1
				2010-10-04	1	1	1
				2010-10-05	1	1	1
				2010-10-06	1	1	1
				2010-10-07	1	1	1
				2010-10-08	1	1	1
				2010-10-09	1	1	1
				2010-10-10	1	1	1
				2010-10-11	1	1	1
				2010-10-12	1	1	1
				2010-10-13	1	1	1
				2010-10-14	1	1	1
				2010-10-15	1	1	1
				2010-10-16	1	1	1
				2010-10-17	1	1	1
				2010-10-18	1	1	1
				2010-10-19	1	1	1
				2010-10-20	1	1	1
				2010-10-21	1	1	1
				2010-10-22	1	1	1
				2010-10-23	1	1	1
				2010-10-24	1	1	1
				2010-10-25	1	1	1
				2010-10-26	1	1	1
				2010-10-27	1	1	1
				2010-10-28	1	1	1
				2010-10-29	1	1	1
				2010-10-30	1	1	1
				2010-10-31	1	1	1
				2010-11-01	1	1	1
				2010-11-02	1	1	1
				2010-11-03	1	1	1
				2010-11-04	1	1	1
				2010-11-05	1	1	1
				2010-11-06	1	1	1
				2010-11-07	1	1	1
				2010-11-08	1	1	1
				2010-11-09	1	1	1
				2010-11-10	1	1	1
				2010-11-11	1	1	1
				2010-11-12	1	1	1
				2010-11-13	1	1	1
				2010-11-14	1	1	1
				2010-11-15	1	1	1
				2010-11-16	1	1	1
				2010-11-17	1	1	1
				2010-11-18	1	1	1
				2010-11-19	1	1	1
				2010-11-20	1	1	1
				2010-11-21	1	1	1
				2010-11-22	1	1	1
				2010-11-23	1	1	1
				2010-11-24	1	1	1
				2010-11-25	1	1	1
				2010-11-26	1	1	1
				2010-11-27	1	1	1
				2010-11-28	1	1	1
				2010-11-29	1	1	1
				2010-11-30	1	1	1
				2010-12-01	1	1	1
				2010-12-02	1	1	1
				2010-12-03	1	1	1
				2010-12-04	1	1	1
				2010-12-05	1	1	1
				2010-12-06	1	1	1
				2010-12-07	1	1	1
				2010-12-08	1	1	1
				2010-12-09	1	1	1
				2010-12-10	1	1	1
				2010-12-11	1	1	1
				2010-12-12	1	1	1
				2010-12-13	1	1	1
				2010-12-14	1	1	1
				2010-12-15	1	1	1
				2010-12-16	1	1	1
				2010-12-17	1	1	1
				2010-12-18	1	1	1
				2010-12-19	1	1	1
				2010-12-20	1	1	1
				2010-12-21	1	1	1
				2010-12-22	1	1	1
				2010-12-23	1	1	1
				2010-12-24	1	1	1
				2010-12-25	1	1	1
				2010-12-26	1	1	1
				2010-12-27	1	1	1
				2010-12-28	1	1	1
				2010-12-29	1	1	1
				2010-12-30	1	1	1
				2010-12-31	1	1	1
				2011-01-01	1	1	1
				2011-01-02	1	1	1
				2011-01-03	1	1	1
				2011-01-04	1	1	1
				2011-01-05	1	1	1
				2011-01-06	1	1	1
				2011-01-07	1	1	1
				2011-01-08	1	1	1
				2011-01-09	1	1	1
				2011-01-10	1	1	1
				2011-01-11	1	1	1
				2011-01-12	1	1	1
				2011-01-13	1	1	1
				2011-01-14	1	1	1
				2011-01-15	1	1	1
				2011-01-16	1	1	1
				2011-01-17	1	1	1
				2011-01-18	1	1	1
				2011-01-19	1	1	1
				2011-01-20	1	1	1
				2011-01-21	1	1	1
				2011-01-22	1	1	1
				2011-01-23	1	1	1
				2011-01-24	1	1	1
				2011-01-25	1	1	1
				2011-01-26	1	1	1
				2011-01-27	1	1	1
				2011-01-28	1	1	1
				2011-01-29	1	1	1
				2011-01-30	1	1	1
				2011-01-31	1	1	1
				2011-02-01	1	1	1
				2011-02-02	1	1	1
				2011-02-03	1	1	1
				2011-02-04	1	1	1
				2011-02-05	1	1	1
				2011-02-06	1	1	1
				2011-02-07	1	1	1
				2011-02-08	1	1	1
				2011-02-09	1	1	1
				2011-02-10	1	1	1
				2011-02-11	1	1	1
				2011-02-12	1	1	1
				2011-02-13	1	1	1
				2011-02-14	1	1	1
				2011-02-15	1	1	1
				2011-02-16	1	1	1
				2011-02-17	1	1	1
				2011-02-18	1	1	1
				2011-02-19	1	1	1
				2011-02-20	1	1	1
				2011-02-21	1	1	1
				2011-02-22	1	1	1
				2011-02-23	1	1	1
				2011-02-24	1	1	1
				2011-02-25	1	1	1
				2011-02-26	1	1	1
				2011-02-27	1	1	1
				2011-02-28	1	1	1
				2011-03-01	1	1	1
				2011-03-02	1	1	1
				2011-03-03	1	1	1
				2011-03-04	1	1	1
				2011-03-05	1	1	1
				2011-03-06	1	1	1
				2011-03-07	1	1	1
				2011-03-08	1	1	1
				2011-03-09	1	1	1
				2011-03-10	1	1	1
				2011-03-11	1	1	1
				2011-03-12	1	1	1
				2011-03-13	1	1	1
				2011-03-14	1	1	1
				2011-03-15	1	1	1
				2011-03-16	1	1	1
				2011-03-17	1	1	1
				2011-03-18	1	1	1
				2011-03-19	1	1	1
				2011-03-20	1	1	1
				2011-03-21	1	1	1
				2011-03-22	1	1	1
				2011-03-23	1	1	1
				2011-03-24	1	1	1
				2011-03-25	1	1	1
				2011-03-26	1	1	1
				2011-03-27	1	1	1
				2011-03-28	1	1	1
				2011-03-29	1	1	1
				2011-03-30	1	1	1
				2011-03-31	1	1	1
				2011-04-01	1	1	1
				2011-04-02	1	1	1
				2011-04-03	1	1	1
				2011-04-04	1	1	1
				2011-04-05	1	1	1
				2011-04-06	1	1	1
				2011-04-07	1	1	1
				2011-04-08	1	1	1
				2011-04-09	1	1	1
				2011-04-10	1	1	1
				2011-04-11	1	1	1
				2011-04-12	1	1	1
				2011-04-13	1	1	1
				2011-04-14	1	1	1
				2011-04-15	1	1	1
				2011-04-16	1	1	1
				2011-04-17	1	1	1
				2011-04-18	1	1	1
				2011-04-19	1	1	1
				2011-04-20	1	1	1
				2011-04-21	1	1	1
				2011-04-22	1	1	1
				2011-04-23	1	1	1
				2011-04-24	1	1	1
				2011-04-25	1	1	1
				2011-04-26	1	1	1
				2011-04-27	1	1	1
				2011-04-28	1	1	1
				2011-04-29	1	1	1
				2011-04-30	1	1	1
				2011-05-01	1	1	1
				2011-05-02	1	1	1
				2011-05-03	1	1	1
				2011-05-04	1	1	1
				2011-05-05	1	1	1
				2011-05-06	1	1	1
				2011-05-07	1	1	1
				2011-05-08	1	1	1
				2011-05-09	1	1	1
				2011-05-10	1	1	1
				2011-05-11	1	1	1
				2011-05-12	1	1	1
				2011-05-13	1	1	1
				2011-05-14	1	1	1
				2011-05-15	1	1	1
				2011-05-16	1	1	1
				2011-05-17	1	1	1
				2011-05-18	1	1	1
				2011-05-19	1	1	1
				2011-05-20	1	1	1
				2011-05-21	1	1	1
				2011-05-22	1	1	1
				2011-05-23	1	1	1
				2011-05-24	1	1	1
				2011-05-25	1	1	1
				2011-05-26	1	1	1
				2011-05-27	1	1	1
				2011-05-28	1	1	1
				2011-05-29	1	1	1
				2011-05-30	1	1	1
				2011-05-31	1	1	1
				2011-06-01	1	1	1
				2011-06-02	1	1	1
				2011-06-03	1	1	1
				2011-06-04	1	1	1
				2011-06-05	1	1	1
				2011-06-06	1	1	1
				2011-06-07	1	1	1
				2011-06-08	1	1	1
				2011-06-09	1	1	1
				2011-06-10	1	1	1
				2011-06-11	1	1	1
				2011-06-12	1	1	1
				2011-06-13	1	1	1
				2011-06-14	1	1	1
				2011-06-15	1	1	1
				2011-06-16	1	1	1
				2011-06-17	1	1	1
				2011-06-18	1	1	1
				2011-06-19	1	1	1
				2011-06-20	1	1	1
				2011-06-21	1	1	1
				2011-06-22	1	1	1
				2011-06-23	1	1	1
				2011-06-24	1	1	1
				2011-06-25	1	1	1
				2011-06-26	1	1	1
				2011-06-27	1	1	1
				2011-06-28	1	1	1
				2011-06-29	1	1	1
				2011-06-30	1	1	1
				2011-07-01	1	1	1
				2011-07-02	1	1	1
				2011-07-03	1	1	1
				2011-07-04	1	1	1
				2011-07-05	1	1	1
				2011-07-06	1	1	1
				2011-07-07	1	1	1
				2011-07-08	1	1	1
				2011-07-09	1	1	1
				2011-07-10	1	1	1
				2011-07-11	1	1	1
				2011-07-12	1	1	1
				2011-07-13	1	1	1
				2011-07-14	1	1	1
				2011-07-15	1	1	1
				2011-07-16	1	1	1
				2011-07-17	1	1	1
				2011-07-18	1	1	1
				2011-07-19	1	1	1
				2011-07-20	1	1	1
				2011-07-21	1	1	1
				2011-07-22	1	1	1
				2011-07-23	1	1	1
				2011-07-24	1	1	1
				2011-07-25	1	1	1
				2011-07-26	1	1	1
				2011-07-27	1	1	1
				2011-07-28	1	1	1
				2011-07-29	1	1	1
				2011-07-30	1	1	1
				2011-07-31	1	1	1
				2011-08-01	1	1	1
				2011-08-02	1	1	1
				2011-08-03	1	1	1
				2011-08-04	1	1	1
				2011-08-05	1	1	1
				2011-08-06	1	1	1
				2011-08-07	1	1	1
				2011-08-08	1	1	1
				2011-08-09	1	1	1
				2011-08-10	1	1	1
				2011-08-11	1	1	1
				2011-08-12	1	1	1
				2011-08-13	1	1	1
				2011-08-14	1	1	1
				2011-08-15	1	1	1
				2011-08-16	1	1	1
				2011-08-17	1	1	1
				2011-08-18	1	1	1
				2011-08-19	1	1	1
				2011-08-20	1	1	1
				2011-08-21	1	1	1
				2011-08-22	1	1	1
				2011-08-23	1	1	1
				2011-08-24	1	1	1
				2011-08-25	1	1	1
				2011-08-26	1	1	1
				2011-08-27	1	1	1
				2011-08-28	1	1	1
				2011-08-29	1	1	1
				2011-08-30	1	1	1
				2011-08-31	1	1	1
				2011-09-01	1	1	1
				2011-09-02	1	1	1
				2011-09-03	1	1	1
				2011-09-04	1	1	1
				2011-09-05	1	1	1
				2011-09-06	1	1	1
				2011-09-07	1	1	1
				2011-09-08	1	1	1
				2011-09-09	1	1	1
				2011-09-10	1	1	1
				2011-09-11	1	1	1
				2011-09-12	1	1	1
				2011-09-13	1	1	1
				2011-09-14	1	1	1
				2011-09-15	1	1	1
				2011-09-16	1	1	1
				2011-09-17	1	1	1
				2011-09-18	1	1	1
				2011-09-19	1	1	1
				2011-09-20	1	1	1
				2011-09-21	1	1	1
				2011-09-22	1	1	1
				2011-09-23	1	1	1
				2011-09-24	1	1	1
				2011-09-25	1	1	1
				2011-09-26	1	1	1
				2011-09-27	1	1	1
				2011-09-28	1	1	1
				2011-09-29	1	1	1
				2011-09-30	1	1	1
				2011-10-01	1	1	1
				2011-10-02	1	1	1
				2011-10-03	1	1	1
				2011-10-04	1	1	1
				2011-10-05	1	1	1
				2011-10-06	1	1	1
				2011-10-07	1	1	1
				2011-10-08	1	1	1
				2011-10-09	1	1	1
				2011-10-10	1	1	1
				2011-10-11	1	1	1
				2011-10-12	1	1	1
				2011-10-13	1	1	1
				2011-10-14	1	1	1
				2011-10-15	1	1	1
				2011-10-16	1	1	1
				2011-10-17	1	1	1
				2011-10-18	1	1	1
				2011-10-19	1	1	1
				2011-10-20	1	1	1
				2011-10-21	1	1	1
				2011-10-22	1	1	1
				2011-10-23	1	1	1
				2011-10-24	1	1	1
				2011-10-25	1	1	1
				2011-10-26	1	1	1
				2011-10-27	1	1	1
				2011-10-28	1	1	1
				2011-10-29	1	1	1
				2011-10-30	1	1	1
				2011-10-31	1	1	1
				2011-11-01	1	1	1
				2011-11-02	1	1	1
				2011-11-03	1	1	1
				2011-11-04	1	1	1
				2011-11-05	1	1	1
				2011-11-06	1	1	1
				2011-11-07	1	1	1
				2011-11-08	1	1	1
				2011-11-09	1	1	1
				2011-11-10	1	1	1
				2011-11-11	1	1	1
				2011-11-12	1	1	1
				2011-11-13	1	1	1
				2011-11-14	1	1	1
				2011-11-15	1	1	1
				2011-11-16	1	1	1
				2011-11-17	1	1	1
				2011-11-18	1	1	1
				2011-11-19	1	1	1
				2011-11-20	1	1	1
				2011-11-21	1	1	1
				2011-11-22	1	1	1
				2011-11-23	1	1	1
				2011-11-24	1	1	1
				2011-11-25	1	1	1
				2011-11-26	1	1	1
				2011-11-27	1	1	1
				2011-11-28	1	1	1
				2011-11-29	1	1	1
				2011-11-30	1	1	1
				2011-12-01	1	1	1
				2011-12-02	1	1	1
				2011-12-03	1	1	1
				2011-12-04	1	1	1
				2011-12-05	1	1	1
				2011-12-06	1	1	1
				2011-12-07	1	1	1
				2011-12-08	1	1	1
				2011-12-09	1	1	1
				2011-12-10	1	1	1
				2011-12-11	1	1	1
				2011-12-12	1	1	1
				2011-12-13	1	1	1
				2011-12-14	1	1	1
				2011-12-15	1	1	1
				2011-12-16	1	1	1
				2011-12-17	1	1	1
				2011-12-18	1	1	1
				2011-12-19	1	1	1
				2011-12-20	1	1	1
				2011-12-21	1	1	1
				2011-12-22	1	1	1
				2011-12-23	1	1	1
				2011-12-24	1	1	1
				2011-12-25	1	1	1
				2011-12-26	1	1	1
				2011-12-27	1	1	1
				2011-12-28	1	1	1
				2011-12-29	1	1	1
				2011-12-30	1	1	1
				2011-12-31	1	1	1
				2012-01-01	1	1	1
				2012-01-02	1	1	1
				2012-01-03	1	1	1
				2012-01-04	1	1	1
				2012-01-05	1	1	1
				2012-01-06	1	1	1
				2012-01-07	1	1	1
				2012-01-08	1	1	1
				2012-01-09	1	1	1
				2012-01-10	1	1	1
				2012-01-11	1	1	1
				2012-01-12	1	1	1
				2012-01-13	1	1	1
				2012-01-14	1	1	1
				2012-01-15	1	1	1
				2012-01-16	1	1	1
				2012-01-17	1	1	1
				2012-01-18	1	1	1
				2012-01-19	1	1	1
				2012-01-20	1	1	1
				2012-01-21	1	1	1
				2012-01-22	1	1	1
				2012-01-23	1	1	1
				2012-01-24	1	1	1
				2012-01-25	1	1	1
				2012-01-26	1	1	1
				2012-01-27	1	1	1
				2012-01-28	1	1	1
				2012-01-29	1	1	1
				2012-01-30	1	1	1
				2012-01-31	1	1	1
				2012-02-01	1	1	1
				2012-02-02	1	1	1
				2012-02-03	1	1	1
				2012-02-04	1	1	1
				2012-02-05	1	1	1
				2012-02-06	1	1	1
				2012-02-07	1	1	1
				2012-02-08	1	1	1
				2012-02-09	1	1	1
				2012-02-10	1	1	1
				2012-02-11	1	1	1
				2012-02-12	1	1	1
				2012-02-13	1	1	1
				2012-02-14	1	1	1
				2012-02-15	1	1	1
				2012-02-16	1	1	1
				2012-02-17	1	1	1
				2012-02-18	1	1	1
				2012-02-19	1	1	1
				2012-02-20	1	1	1
				2012-02-21	1	1	1
				2012-02-22	1	1	1
				2012-02-23	1	1	1
				2012-02-24	1	1	1
				2012-02-25	1	1	1
				2012-02-26	1	1	1
				2012-02-27	1	1	1
				2012-02-28	1	1	1
				2012-02-29	1	1	1
				2012-03-01	1	1	1
				2012-03-02	1	1	1
				2012-03-03	1	1	1
				2012-03-04	1	1	1
				2012-03-05	1	1	1
				2012-03-06	1	1	1
				2012-03-07	1	1	1
				2012-03-08	1	1	1
				2012-03-09	1	1	1
				2012-03-10	1	1	1
				2012-03-11	1	1	1
				2012-03-12	1	1	1
				2012-03-13	1	1	1
				2012-03-14	1	1	1
				2012-03-15	1	1	1
				2012-03-16	1	1	1
				2012-03-17	1	1	1
				2012-03-18	1	1	1
				2012-03-19	1	1	1
				2012-03-20	1	1	1
				2012-03-21	1	1	1
				2012-03-22	1	1	1
				2012-03-23	1	1	1
				2012-03-24	1	1	1
				2012-03-25	1	1	1
				2012-03-26	1	1	1
				2012-03-27	1	1	1
				2012-03-28	1	1	1
				2012-03-29	1	1	1
				2012-03-30	1	1	1
				2012-03-31	1	1	1
				2012-04-01	1	1	1
				2012-04-02	1	1	1
				2012-04-03	1	1	1
				2012-04-04	1	1	1
				2012-04-05	1	1	1
				2012-04-06	1	1	1
				2012-04-07	1	1	1
				2012-04-08	1	1	1
				2012-04-09	1	1	1
				2012-04-10	1	1	1
				2012-04-11	1	1	1
				2012-04-12	1	1	1
				2012-04-13	1	1	1
				2012-04-14	1	1	1
				2012-04-15	1	1	1
				2012-04-16	1	1	1
				2012-04-17	1	1	1
				2012-04-18	1	1	1
				2012-04-19	1	1	1
				2012-04-20	1	1	1
				2012-04-21	1	1	1
				2012-04-22	1	1	1
				2012-04-23	1	1	1
				2012-04-24	1	1	1
				2012-04-25	1	1	1
				2012-04-26	1	1	1
				2012-04-27	1	1	1
				2012-04-28	1	1	1
				2012-04-29	1	1	1
				2012-04-30	1	1	1
				2012-05-01	1	1	1
				2012-05-02	1	1	1
				2012-05-03	1	1	1
				2012-05-04	1	1	1
				2012-05-05	1	1	1
				2012-05-06	1	1	1
				2012-05-07	1	1	1
				2012-05-08	1	1	1
				2012-05-09	1	1	1
				2012-05-10	1	1	1
				2012-05-11	1	1	1
				2012-05-12	1	1	1
				2012-05-13	1	1	1
				2012-05-14	1	1	1
				2012-05-15	1	1	1
				2012-05-16	1	1	1
				2012-05-17	1	1	1
				2012-05-18	1	1	1
				2012-05-19	1	1	1
				2012-05-20	1	1	1
				2012-05-21	1	1	1
				2012-05-22	1	1	1
				2012-05-23	1	1	1
				2012-05-24	1	1	1
				2012-05-25	1	1	1
				2012-05-26	1	1	1
				2012-05-27	1	1	1
				2012-05-28	1	1	1
				2012-05-29	1	1	1
				2012-05-30	1	1	1
				2012-05-31	1	1	1
				2012-06-01	1	1	1
				2012-06-02	1	1	1
				2012-06-03	1	1	1
				2012-06-04	1	1	1
				2012-06-05	1	1	1
				2012-06-06	1	1	1
				2012-06-07	1	1	1
				2012-06-08	1	1	1
				2012-06-09	1	1	1
				2012-06-10	1	1	1
				2012-06-11	1	1	1
				2012-06-12	1	1	1
				2012-06-13	1	1	1
				2012-06-14	1	1	1
				2012-06-15	1	1	1
				2012-06-16	1	1	1
				2012-06-17	1	1	1
				2012-06-18	1	1	1
				2012-06-19	1	1	1
				2012-06-20	1	1	1
				2012-06-21	1	1	1
				2012-06-22	1	1	1
				2012-06-23	1	1	1
				2012-06-24	1	1	1
				2012-06-25	1	1	1
				2012-06-26	1	1	1
				2012-06-27	1	1	1
				2012-06-28	1	1	1
				2012-06-29	1	1	1
				2012-06-30	1	1	1
				2012-07-01	1	1	1
				2012-07-02	1	1	1
				2012-07-03	1	1	1
				2012-07-04	1	1	1
				2012-07-05	1	1	1
				2012-07-06	1	1	1
				2012-07-07	1	1	1
				2012-07-08	1	1	1
				2012-07-09	1	1	1
				2012-07-10	1	1	1
				2012-07-11	1	1	1
				2012-07-12	1	1	1
				2012-07-13	1	1	1
				2012-07-14	1	1	1
				2012-07-15	1	1	1
				2012-07-16	1	1	1
				2012-07-17	1	1	1
				2012-07-18	1	1	1
				2012-07-19	1	1	1
				2012-07-20	1	1	1
				2012-07-21	1	1	1
				2012-07-22	1	1	1
				2012-07-23	1	1	1
				2012-07-24	1	1	1
				2012-07-25	1	1	1
				2012-07-26	1	1	1
				2012-07-27	1	1	1
				2012-07-28	1	1	1
				2012-07-29	1	1	1
				2012-07-30	1	1	1
				2012-07-31	1	1	1
				2012-08-01	1	1	1
				2012-08-02	1	1	1
				2012-08-03	1	1	1
				2012-08-04	1	1	1
				2012-08-05	1	1	1
				2012-08-06	1	1	1
				2012-08-07	1	1	1
				2012-08-08	1	1	1
				2012-08-09	1	1	1
				2012-08-10	1	1	1
				2012-08-11	1	1	1
				2012-08-12	1	1	1
				2012-08-13	1	1	1
				2012-08-14	1	1	1
				2012-08-15	1	1	1
				2012-08-16	1	1	1
				2012-08-17	1	1	1
				2012-08-18	1	1	1
				2012-08-19	1	1	1
				2012-08-20	1	1	1
				2012-08-21	1	1	1
				2012-08-22	1	1	1
				2012-08-23	1	1	1
				2012-08-24	1	1	1
				2012-08-25	1	1	1
				2012-08-26	1	1	1
				2012-08-27	1	1	1
				2012-08-28	1	1	1
				2012-08-29	1	1	1
				2012-08-30	1	1	1
				2012-08-31	1	1	1
				2012-09-01	1	1	1
				2012-09-02	1	1	1
				2012-09-03	1	1	1
				2012-09-04	1	1	1
				2012-09-05	1	1	1
				2012-09-06	1	1	1
				2012-09-07	1	1	1
				2012-09-08	1	1	1
				2012-09-09	1	1	1
				2012-09-10	1	1	1
				2012-09-11	1	1	1
				2012-09-12	1	1	1
				2012-09-13	1	1	1
				2012-09-14	1	1	1
				2012-09-15	1	1	1
				2012-09-16	1	1	1
				2012-09-17	1	1	1
				2012-09-18	1	1	1
				2012-09-19	1	1	1
				2012-09-20	1	1	1
				2012-09-21	1	1	1
				2012-09-22	1	1	1
				2012-09-23	1	1	1
				2012-09-24	1	1	1
				2012-09-25	1	1	1
				2012-09-26	1	1	1
				2012-09-27	1	1	1
				2012-09-28	1	1	1
				2012-09-29	1	1	1
				2012-09-30	1	1	1
				2012-10-01	1	1	1
				2012-10-02	1	1	1
				2012-10-03	1	1	1
				2012-10-04	1	1	1
				2012-10-05	1	1	1
				2012-10-06	1	1	1
				2012-10-07	1	1	1
				2012-10-08	1	1	1
				2012-10-09	1	1	1
				2012-10-10	1	1	1
				2012-10-11	1	1	1
				2012-10-12	1	1	1
				2012-10-13	1	1	1
				2012-10-14	1	1	1
				2012-10-15	1	1	1
				2012-10-16	1	1	1
				2012-10-17	1	1	1
				2012-10-18	1	1	1
				2012-10-19	1	1	1
				2012-10-20	1	1	1
				2012-10-21	1	1	1
				2012-10-22	1	1	1
				2012-10-23	1	1	1
				2012-10-24	1	1	1
				2012-10-25	1	1	1
				2012-10-26	1	1	1
				2012-10-27	1	1	1
				2012-10-28	1	1	1
				2012-10-29	1	1	1
				2012-10-30	1	1	1
				2012-10-31	1	1	1
				2012-11-01	1	1	1
				2012-11-02	1	1	1
				2012-11-03	1	1	1
				2012-11-04	1	1	1
				2012-11-05	1	1	1
				2012-11-06	1	1	1
				2012-11-07	1	1	1
				2012-11-08	1	1	1
				2012-11-09	1	1	1
				2012-11-10	1	1	1
				2012-11-11	1	1	1
				2012-11-12	1	1	1
				2012-11-13	1	1	1
				2012-11-14	1	1	1
				2012-11-15	1	1	1
				2012-11-16	1	1	1
				2012-11-17	1	1	1
				2012-11-18	1	1	1
				2012-11-19	1	1	1
				2012-11-20	1	1	1
				2012-11-21	1	1	1
				2012-11-22	1	1	1
				2012-11-23	1	1	1
				2012-11-24	1	1	1
				2012-11-25	1	1	1
				2012-11-26	1	1	1
				2012-11-27	1	1	1
				2012-11-28	1	1	1
				2012-11-29	1	1	1
				2012-11-30	1	1	1
				2012-12-01	1	1	1
				2012-12-02	1	1	1
				2012-12-03	1	1	1
				2012-12-04	1	1	1
				2012-12-05	1	1	1
				2012-12-06	1	1	1
				2012-12-07	1	1	1
				2012-12-08	1	1	1
				2012-12-09	1	1	1
				2012-12-10	1	1	1
				2012-12-11	1	1	1
				2012-12-12	1	1	1
				2012-12-13	1	1	1
				2012-12-14	1	1	1
				2012-12-15	1	1	1
				2012-12-16	1	1	1
				2012-12-17	1	1	1
				2012-12-18	1	1	1
				2012-12-19	1	1	1
				2012-12-20	1	1	1
				2012-12-21	1	1	1
				2012-12-22	1	1	1
				2012-12-23	1	1	1
				2012-12-24	1	1	1
				2012-12-25	1	1	1
				2012-12-26	1	1	1
				2012-12-27	1	1	1
				2012-12-28	1	1	1
				2012-12-29	1	1	1
				2012-12-30	1	1	1
				2012-12-31	1	1	1
				2013-01-01	1	1	1
				2013-01-02	1	1	1
				2013-01-03	1	1	1
				2013-01-04	1	1	1
				2013-01-05	1	1	1
				2013-01-06	1	1	1
				2013-01-07	1	1	1
				2013-01-08	1	1	1
				2013-01-09	1	1	1
				2013-01-10	1	1	1
				2013-01-11	1	1	1
				2013-01-12	1	1	1
				2013-01-13	1	1	1
				2013-01-14	1	1	1
				2013-01-15	1	1	1
				2013-01-16	1	1	1
				2013-01-17	1	1	1
				2013-01-18	1	1	1
				2013-01-19	1	1	1
				2013-01-20	1	1	1
				2013-01-21	1	1	1
				2013-01-22	1	1	1
				2013-01-23	1	1	1
				2013-01-24	1	1	1
				2013-01-25	1	1	1
				2013-01-26	1	1	1
				2013-01-27	1	1	1
				2013-01-28	1	1	1
				2013-01-29	1	1	1
				2013-01-30	1	1	1
				2013-01-31	1	1	1
				2013-02-01	1	1	1
				2013-02-02	1	1	1
				2013-02-03	1	1	1
				2013-02-04	1	1	1
				2013-02-05	1	1	1
				2013-02-06	1	1	1
				2013-02-07	1	1	1
				2013-02-08	1	1	1
				2013-02-09	1	1	1
				2013-02-10	1	1	1
				2013-02-11	1	1	1
				2013-02-12	1	1	1
				2013-02-13	1	1	1
				2013-02-14	1	1	1
				2013-02-15	1	1	1
				2013-02-16	1	1	1
				2013-02-17	1	1	1
				2013-02-18	1	1	1
				2013-02-19	1	1	1
				2013-02-20	1	1	1
				2013-02-21	1	1	1
				2013-02-22	1	1	1
				2013-02-23	1	1	1
				2013-02-24	1	1	1
				2013-02-25	1	1	1
				2013-02-26	1	1	1
				2013-02-27	1	1	1
				2013-02-28	1	1	1
				2013-03-01	1	1	1
				2013-03-02	1	1	1
				2013-03-03	1	1	1
				2013-03-04	1	1	1
				2013-03-05	1	1	1
				2013-03-06	1	1	1
				2013-03-07	1	1	1
				2013-03-08	1	1	1
				2013-03-09	1	1	1
				2013-03-10	1	1	1
				2013-03-11	1	1	1
				2013-03-12	1	1	1
				2013-03-13	1	1	1
				2013-03-14	1	1	1
				2013-03-15	1	1	1
				2013-03-16	1	1	1
				2013-03-17	1	1	1
				2013-03-18	1	1	1
				2013-03-19	1	1	1
				2013-03-20	1	1	1
				2013-03-21	1	1	1
				2013-03-22	1	1	1
				2013-03-23	1	1	1
				2013-03-24	1	1	1
				2013-03-25	1	1	1
				2013-03-26	1	1	1
				2013-03-27	1	1	1
				2013-03-28	1	1	1
				2013-03-29	1	1	1
				2013-03-30	1	1	1
				2013-03-31	1	1	1
				2013-04-01	1	1	1
				2013-04-02	1	1	1
				2013-04-03	1	1	1
				2013-04-04	1	1	1
				2013-04-05	1	1	1
				2013-04-06	1	1	1
				2013-04-07	1	1	1
				2013-04-08	1	1	1
				2013-04-09	1	1	1
				2013-04-10	1	1	1
				2013-04-11	1	1	1
				2013-04-12	1	1	1
				2013-04-13	1	1	1
				2013-04-14	1	1	1
				2013-04-15	1	1	1
				2013-04-16	1	1	1
				2013-04-17	1	1	1
				2013-04-18	1	1	1
				2013-04-19	1	1	1
				2013-04-20	1	1	1
				2013-04-21	1	1	1
				2013-04-22	1	1	1
				2013-04-23	1	1	1
				2013-04-24	1	1	1
				2013-04-25	1	1	1
				2013-04-26	1	1	1
				2013-04-27	1	1	1
				2013-04-28	1	1	1
				2013-04-29	1	1	1
				2013-04-30	1	1	1
				2013-05-01	1	1	1
				2013-05-02	1	1	1
				2013-05-03	1	1	1
				2013-05-04	1	1	1
				2013-05-05	1	1	1
				2013-05-06	1	1	1
				2013-05-07	1	1	1
				2013-05-08	1	1	1
				2013-05-09	1	1	1
				2013-05-10	1	1	1
				2013-05-11	1	1	1
				2013-05-12	1	1	1
				2013-05-13	1	1	1
				2013-05-14	1	1	1
				2013-05-15	1	1	1
				2013-05-16	1	1	1
				2013-05-17	1	1	1
				2013-05-18	1	1	1
				2013-05-19	1	1	1
				2013-05-20	1	1	1
				2013-05-21	1	1	1
				2013-05-22	1	1	1
				2013-05-23	1	1	1
				2013-05-24	1	1	1
				2013-05-25	1	1	1
				2013-05-26	1	1	1
				2013-05-27	1	1	1
				2013-05-28	1	1	1
				2013-05-29	1	1	1
				2013-05-30	1	1	1
				2013-05-31	1	1	1
				2013-06-01	1	1	1
				2013-06-02	1	1	1
				2013-06-03	1	1	1
				2013-06-04	1	1	1
				2013-06-05	1	1	1
				2013-06-06	1	1	1
				2013-06-07	1	1	1
				2013-06-08	1	1	1
				2013-06-09	1	1	1
				2013-06-10	1	1	1
				2013-06-11	1	1	1
				2013-06-12	1	1	1
				2013-06-13	1	1	1
				2013-06-14	1	1	1
				2013-06-15	1	1	1
				2013-06-16	1	1	1
				2013-06-17	1	1	1
				2013-06-18	1	1	1
				2013-06-19	1	1	1
				2013-06-20	1	1	1
				2013-06-21	1	1	1
				2013-06-22	1	1	1
				2013-06-23	1	1	1
				2013-06-24	1	1	1
				2013-06-25	1	1	1
				2013-06-26	1	1	1
				2013-06-27	1	1	1
				2013-06-28	1	1	1
				2013-06-29	1	1	1
				2013-06-30	1	1	1
				2013-07-01	1	1	1
				2013-07-02	1	1	1
				2013-07-03	1	1	1
				2013-07-04	1	1	1
				2013-07-05	1	1	1
				2013-07-06	1	1	1
				2013-07-07	1	1	1
				2013-07-08	1	1	1
				2013-07-09	1	1	1
				2013-07-10	1	1	1
				2013-07-11	1	1	1
				2013-07-12	1	1	1
				2013-07-13	1	1	1
				2013-07-14	1	1	1
				2013-07-15	1	1	1
				2013-07-16	1	1	1
				2013-07-17	1	1	1
				2013-07-18	1	1	1
				2013-07-19	1	1	1
				2013-07-20	1	1	1
				2013-07-21	1	1	1
				2013-07-22	1	1	1
				2013-07-23	1	1	1
				2013-07-24	1	1	1
				2013-07-25	1	1	1
				2013-07-26	1	1	1
				2013-07-27	1	1	1
				2013-07-28	1	1	1
				2013-07-29	1	1	1
				2013-07-30	1	1	1
				2013-07-31	1	1	1
				2013-08-01	1	1	1
				2013-08-02	1	1	1
				2013-08-03	1	1	1
				2013-08-04	1	1	1
				2013-08-05	1	1	1
				2013-08-06	1	1	1
				2013-08-07	1	1	1
				2013-08-08	1	1	1
				2013-08-09	1	1	1
				2013-08-10	1	1	1
				2013-08-11	1	1	1
				2013-08-12	1	1	1
				2013-08-13	1	1	1
				2013-08-14	1	1	1
				2013-08-15	1	1	1
				2013-08-16	1	1	1
				2013-08-17	1	1	1
				2013-08-18	1	1	1
				2013-08-19	1	1	1
				2013-08-20	1	1	1
				2013-08-21	1	1	1
				2013-08-22	1	1	1
				2013-08-23	1	1	1
				2013-08-24	1	1	1
				2013-08-25	1	1	1
				2013-08-26	1	1	1
				2013-08-27	1	1	1
				2013-08-28	1	1	1
				2013-08-29	1	1	1
				2013-08-30	1	1	1
				2013-08-31	1	1	1
				2013-09-01	1	1	1
				2013-09-02	1	1	1
				2013-09-03	1	1	1
				2013-09-04	1	1	1
				2013-09-05	1	1	1
				2013-09-06	1	1	1
				2013-09-07	1	1	1
				2013-09-08	1	1	1
				2013-09-09	1	1	1
				2013-09-10	1	1	1
				2013-09-11	1	1	1
				2013-09-12	1	1	1
				2013-09-13	1	1	1
				2013-09-14	1	1	1
				2013-09-15	1	1	1
				2013-09-16	1	1	1
				2013-09-17	1	1	1
				2013-09-18	1	1	1
				2013-09-19	1	1	1
				2013-09-20	1	1	1
				2013-09-21	1	1	1
				2013-09-22	1	1	1
				2013-09-23	1	1	1
				2013-09-24	1	1	1
				2013-09-25	1	1	1
				2013-09-26	1	1	1
				2013-09-27	1	1	1
				2013-09-28	1	1	1
				2013-09-29	1	1	1
				2013-09-30	1	1	1
				2013-10-01	1	1	1
				2013-10-02	1	1	1
				2013-10-03	1	1	1
				2013-10-04	1	1	1
				2013-10-05	1	1	1
				2013-10-06	1	1	1
				2013-10-07	1	1	1
				2013-10-08	1	1	1
				2013-10-09	1	1	1
				2013-10-10	1	1	1
				2013-10-11	1	1	1
				2013-10-12	1	1	1
				2013-10-13	1	1	1
				2013-10-14	1	1	1
				2013-10-15	1	1	1
				2013-10-16	1	1	1
				2013-10-17	1	1	1
				2013-10-18	1	1	1
				2013-10-19	1	1	1
				2013-10-20	1	1	1
				2013-10-21	1	1	1
				2013-10-22	1	1	1
				2013-10-23	1	1	1
				2013-10-24	1	1	1
				2013-10-25	1	1	1
				2013-10-26	1	1	1
				2013-10-27	1	1	1
				2013-10-28	1	1	1
				2013-10-29	1	1	1
				2013-10-30	1	1	1
				2013-10-31	1	1	1
				2013-11-01	1	1	1
				2013-11-02	1	1	1
				2013-11-03	1	1	1
				2013-11-04	1	1	1
				2013-11-05	1	1	1
				2013-11-06	1	1	1
				2013-11-07	1	1	1
				2013-11-08	1	1	1
				2013-11-09	1	1	1
				2013-11-10	1	1	1
				2013-11-11	1	1	1
				2013-11-12	1	1	1
				2013-11-13	1	1	1
				2013-11-14	1	1	1
				2013-11-15	1	1	1
				2013-11-16	1	1	1
				2013-11-17	1	1	1
				2013-11-18	1	1	1
				2013-11-19	1	1	1
				2013-11-20	1	1	1
				2013-11-21	1	1	1
				2013-11-22	1	1	1
				2013-11-23	1	1	1
				2013-11-24	1	1	1
				2013-11-25	1	1	1
				2013-11-26	1	1	1
				2013-11-27	1	1	1
				2013-11-28	1	1	1
				2013-11-29	1	1	1
				2013-11-30	1	1	1
				2013-12-01	1	1	1
				2013-12-02	1	1	1
				2013-12-03	1	1	1
				2013-12-04	1	1	1
				2013-12-05	1	1	1
				2013-12-06	1	1	1
				2013-12-07	1	1	1
				2013-12-08	1	1	1
				2013-12-09	1	1	1
				2013-12-10	1	1	1
				2013-12-11	1	1	1
				2013-12-12	1	1	1
				2013-12-13	1	1	1
				2013-12-14	1	1	1
				2013-12-15	1	1	1
				2013-12-16	1	1	1
				2013-12-17	1	1	1
				2013-12-18	1	1	1
				2013-12-19	1	1	1
				2013-12-20	1	1	1
				2013-12-21	1	1	1
				2013-12-22	1	1	1
				2013-12-23	1	1	1
				2013-12-24	1	1	1
				2013-12-25	1	1	1
				2013-12-26	1	1	1
				2013-12-27	1	1	1
				2013-12-28	1	1	1
				2013-12-29	1	1	1
				2013-12-30	1	1	1
				2013-12-31	1	1	1
				2014-01-01	1	1	1
				2014-01-02	1	1	1
				2014-01-03	1	1	1
				2014-01-04	1	1	1
				2014-01-05	1	1	1
				2014-01-06	1	1	1
				2014-01-07	1	1	1
				2014-01-08	1	1	1
				2014-01-09	1	1	1
				2014-01-10	1	1	1
				2014-01-11	1	1	1
				2014-01-12	1	1	1
				2014-01-13	1	1	1
				2014-01-14	1	1	1
				2014-01-15	1	1	1
				2014-01-16	1	1	1
				2014-01-17	1	1	1
				2014-01-18	1	1	1
				2014-01-19	1	1	1
				2014-01-20	1	1	1
				2014-01-21	1	1	1
				2014-01-22	1	1	1
				2014-01-23	1	1	1
				2014-01-24	1	1	1
				2014-01-25	1	1	1
				2014-01-26	1	1	1
				2014-01-27	1	1	1
				2014-01-28	1	1	1
				2014-01-29	1	1	1
				2014-01-30	1	1	1
				2014-01-31	1	1	1
				2014-02-01	1	1	1
				2014-02-02	1	1	1
				2014-02-03	1	1	1
				2014-02-04	1	1	1
				2014-02-05	1	1	1
				2014-02-06	1	1	1
				2014-02-07	1	1	1
				2014-02-08	1	1	1
				2014-02-09	1	1	1
				2014-02-10	1	1	1
				2014-02-11	1	1	1
				2014-02-12	1	1	1
				2014-02-13	1	1	1
				2014-02-14	1	1	1
				2014-02-15	1	1	1
				2014-02-16	1	1	1
				2014-02-17	1	1	1
				2014-02-18	1	1	1
				2014-02-19	1	1	1
				2014-02-20	1	1	1
				2014-02-21	1	1	1
				2014-02-22	1	1	1
				2014-02-23	1	1	1
				2014-02-24	1	1	1
				2014-02-25	1	1	1
				2014-02-26	1	1	1
				2014-02-27	1	1	1
				2014-02-28	1	1	1
				2014-03-01	1	1	1
				2014-03-02	1	1	1
				2014-03-03	1	1	1
				2014-03-04	1	1	1
				2014-03-05	1	1	1
				2014-03-06	1	1	1
				2014-03-07	1	1	1
				2014-03-08	1	1	1
				2014-03-09	1	1	1
				2014-03-10	1	1	1
				2014-03-11	1	1	1
				2014-03-12	1	1	1
				2014-03-13	1	1	1
				2014-03-14	1	1	1
				2014-03-15	1	1	1
				2014-03-16	1	1	1
				2014-03-17	1	1	1
				2014-03-18	1	1	1
				2014-03-19	1	1	1
				2014-03-20	1	1	1
				2014-03-21	1	1	1
				2014-03-22	1	1	1
				2014-03-23	1	1	1
				2014-03-24	1	1	1
				2014-03-25	1	1	1
				2014-03-26	1	1	1
				2014-03-27	1	1	1
				2014-03-28	1	1	1
				2014-03-29	1	1	1
				2014-03-30	1	1	1
				2014-03-31	1	1	1
				2014-04-01	1	1	1
				2014-04-02	1	1	1
				2014-04-03	1	1	1
				2014-04-04	1	1	1
				2014-04-05	1	1	1
				2014-04-06	1	1	1
				2014-04-07	1	1	1
				2014-04-08	1	1	1
				2014-04-09	1	1	1
				2014-04-10	1	1	1
				2014-04-11	1	1	1
				2014-04-12	1	1	1
				2014-04-13	1	1	1
				2014-04-14	1	1	1
				2014-04-15	1	1	1
				2014-04-16	1	1	1
				2014-04-17	1	1	1
				2014-04-18	1	1	1
				2014-04-19	1	1	1
				2014-04-20	1	1	1
				2014-04-21	1	1	1
				2014-04-22	1	1	1
				2014-04-23	1	1	1
				2014-04-24	1	1	1
				2014-04-25	1	1	1
				2014-04-26	1	1	1
				2014-04-27	1	1	1
				2014-04-28	1	1	1
				2014-04-29	1	1	1
				2014-04-30	1	1	1
				2014-05-01	1	1	1
				2014-05-02	1	1	1
				2014-05-03	1	1	1
				2014-05-04	1	1	1
				2014-05-05	1	1	1
				2014-05-06	1	1	1
				2014-05-07	1	1	1
				2014-05-08	1	1	1
				2014-05-09	1	1	1
				2014-05-10	1	1	1
				2014-05-11	1	1	1
				2014-05-12	1	1	1
				2014-05-13	1	1	1
				2014-05-14	1	1	1
				2014-05-15	1	1	1
				2014-05-16	1	1	1
				2014-05-17	1	1	1
				2014-05-18	1	1	1
				2014-05-19	1	1	1
				2014-05-20	1	1	1
				2014-05-21	1	1	1
				2014-05-22	1	1	1
				2014-05-23	1	1	1
				2014-05-24	1	1	1
				2014-05-25	1	1	1
				2014-05-26	1	1	1
				2014-05-27	1	1	1
				2014-05-28	1	1	1
				2014-05-29	1	1	1
				2014-05-30	1	1	1
				2014-05-31	1	1	1
				2014-06-01	1	1	1
				2014-06-02	1	1	1
				2014-06-03	1	1	1
				2014-06-04	1	1	1
				2014-06-05	1	1	1
				2014-06-06	1	1	1
				2014-06-07	1	1	1
				2014-06-08	1	1	1
				2014-06-09	1	1	1
				2014-06-10	1	1	1
				2014-06-11	1	1	1
				2014-06-12	1	1	1
				2014-06-13	1	1	1
				2014-06-14	1	1	1
				2014-06-15	1	1	1
				2014-06-16	1	1	1
				2014-06-17	1	1	1
				2014-06-18	1	1	1
				2014-06-19	1	1	1
				2014-06-20	1	1	1
				2014-06-21	1	1	1
				2014-06-22	1	1	1
				2014-06-23	1	1	1
				2014-06-24	1	1	1
				2014-06-25	1	1	1
				2014-06-26	1	1	1
				2014-06-27	1	1	1
				2014-06-28	1	1	1
				2014-06-29	1	1	1
				2014-06-30	1	1	1
				2014-07-01	1	1	1
				2014-07-02	1	1	1
				2014-07-03	1	1	1
				2014-07-04	1	1	1
				2014-07-05	1	1	1
				2014-07-06	1	1	1
				2014-07-07	1	1	1
				2014-07-08	1	1	1
				2014-07-09	1	1	1
				2014-07-10	1	1	1
				2014-07-11	1	1	1
				2014-07-12	1	1	1
				2014-07-13	1	1	1
				2014-07-14	1	1	1
				2014-07-15	1	1	1
				2014-07-16	1	1	1
				2014-07-17	1	1	1
				2014-07-18	1	1	1
				2014-07-19	1	1	1
				2014-07-20	1	1	1
				2014-07-21	1	1	1
				2014-07-22	1	1	1
				2014-07-23	1	1	1
				2014-07-24	1	1	1
				2014-07-25	1	1	1
				2014-07-26	1	1	1
				2014-07-27	1	1	1
				2014-07-28	1	1	1
				2014-07-29	1	1	1
				2014-07-30	1	1	1
				2014-07-31	1	1	1
				2014-08-01	1	1	1
				2014-08-02	1	1	1
				2014-08-03	1	1	1
				2014-08-04	1	1	1
				2014-08-05	1	1	1
				2014-08-06	1	1	1
				2014-08-07	1	1	1
				2014-08-08	1	1	1
				2014-08-09	1	1	1
				2014-08-10	1	1	1
				2014-08-11	1	1	1
				2014-08-12	1	1	1
				2014-08-13	1	1	1
				2014-08-14	1	1	1
				2014-08-15	1	1	1
				2014-08-16	1	1	1
				2014-08-17	1	1	1
				2014-08-18	1	1	1
				2014-08-19	1	1	1
				2014-08-20	1	1	1
				2014-08-21	1	1	1
				2014-08-22	1	1	1
				2014-08-23	1	1	1
				2014-08-24	1	1	1
				2014-08-25	1	1	1
				2014-08-26	1	1	1
				2014-08-27	1	1	1
				2014-08-28	1	1	1
				2014-08-29	1	1	1
				2014-08-30	1	1	1
				2014-08-31	1	1	1
				2014-09-01	1	1	1
				2014-09-02	1	1	1
				2014-09-03	1	1	1
				2014-09-04	1	1	1
				2014-09-05	1	1	1
				2014-09-06	1	1	1
				2014-09-07	1	1	1
				2014-09-08	1	1	1
				2014-09-09	1	1	1
				2014-09-10	1	1	1
				2014-09-11	1	1	1
				2014-09-12	1	1	1
				2014-09-13	1	1	1
				2014-09-14	1	1	1
				2014-09-15	1	1	1
				2014-09-16	1	1	1
				2014-09-17	1	1	1
				2014-09-18	1	1	1
				2014-09-19	1	1	1
				2014-09-20	1	1	1
				2014-09-21	1	1	1
				2014-09-22	1	1	1
				2014-09-23	1	1	1
				2014-09-24	1	1	1
				2014-09-25	1	1	1
				2014-09-26	1	1	1
				2014-09-27	1	1	1
				2014-09-28	1	1	1
				2014-09-29	1	1	1
				2014-09-30	1	1	1
				2014-10-01	1	1	1
				2014-10-02	1	1	1
				2014-10-03	1	1	1
				2014-10-04	1	1	1
				2014-10-05	1	1	1
				2014-10-06	1	1	1
				2014-10-07	1	1	1
				2014-10-08	1	1	1
				2014-10-09	1	1	1
				2014-10-10	1	1	1
				2014-10-11	1	1	1
				2014-10-12	1	1	1
				2014-10-13	1	1	1
				2014-10-14	1	1	1
				2014-10-15	1	1	1
				2014-10-16	1	1	1
				2014-10-17	1	1	1
				2014-10-18	1	1	1
				2014-10-19	1	1	1
				2014-10-20	1	1	1
				2014-10-21	1	1	1
				2014-10-22	1	1	1
				2014-10-23	1	1	1
				2014-10-24	1	1	1
				2014-10-25	1	1	1
				2014-10-26	1	1	1
				2014-10-27	1	1	1
				2014-10-28	1	1	1
				2014-10-29	1	1	1
				2014-10-30	1	1	1
				2014-10-31	1	1	1
				2014-11-01	1	1	1
				2014-11-02	1	1	1
				2014-11-03	1	1	1
				2014-11-04	1	1	1
				2014-11-05	1	1	1
				2014-11-06	1	1	1
				2014-11-07	1	1	1
				2014-11-08	1	1	1
				2014-11-09	1	1	1
				2014-11-10	1	1	1
				2014-11-11	1	1	1
				2014-11-12	1	1	1
				2014-11-13	1	1	1
				2014-11-14	1	1	1
				2014-11-15	1	1	1
				2014-11-16	1	1	1
				2014-11-17	1	1	1
				2014-11-18	1	1	1
				2014-11-19	1	1	1
				2014-11-20	1	1	1
				2014-11-21	1	1	1
				2014-11-22	1	1	1
				2014-11-23	1	1	1
				2014-11-24	1	1	1
				2014-11-25	1	1	1
				2014-11-26	1	1	1
				2014-11-27	1	1	1
				2014-11-28	1	1	1
				2014-11-29	1	1	1
				2014-11-30	1	1	1
				2014-12-01	1	1	1
				2014-12-02	1	1	1
				2014-12-03	1	1	1
				2014-12-04	1	1	1
				2014-12-05	1	1	1
				2014-12-06	1	1	1
				2014-12-07	1	1	1
				2014-12-08	1	1	1
				2014-12-09	1	1	1
				2014-12-10	1	1	1
				2014-12-11	1	1	1
				2014-12-12	1	1	1
				2014-12-13	1	1	1
				2014-12-14	1	1	1
				2014-12-15	1	1	1
				2014-12-16	1	1	1
				2014-12-17	1	1	1
				2014-12-18	1	1	1
				2014-12-19	1	1	1
				2014-12-20	1	1	1
				2014-12-21	1	1	1
				2014-12-22	1	1	1
				2014-12-23	1	1	1
				2014-12-24	1	1	1
				2014-12-25	1	1	1
				2014-12-26	1	1	1
				2014-12-27	1	1	1
				2014-12-28	1	1	1
				2014-12-29	1	1	1
				2014-12-30	1	1	1
				2014-12-31	1	1	1
				2015-01-01	1	1	1
				2015-01-02	1	1	1
				2015-01-03	1	1	1
				2015-01-04	1	1	1
				2015-01-05	1	1	1
				2015-01-06	1	1	1
				2015-01-07	1	1	1
				2015-01-08	1	1	1
				2015-01-09	1	1	1
				2015-01-10	1	1	1
				2015-01-11	1	1	1
				2015-01-12	1	1	1
				2015-01-13	1	1	1
				2015-01-14	1	1	1
				2015-01-15	1	1	1
				2015-01-16	1	1	1
				2015-01-17	1	1	1
				2015-01-18	1	1	1
				2015-01-19	1	1	1
				2015-01-20	1	1	1
				2015-01-21	1	1	1
				2015-01-22	1	1	1
				2015-01-23	1	1	1
				2015-01-24	1	1	1
				2015-01-25	1	1	1
				2015-01-26	1	1	1
				2015-01-27	1	1	1
				2015-01-28	1	1	1
				2015-01-29	1	1	1
				2015-01-30	1	1	1
				2015-01-31	1	1	1
				2015-02-01	1	1	1
				2015-02-02	1	1	1
				2015-02-03	1	1	1
				2015-02-04	1	1	1
				2015-02-05	1	1	1
				2015-02-06	1	1	1
				2015-02-07	1	1	1
				2015-02-08	1	1	1
				2015-02-09	1	1	1
				2015-02-10	1	1	1
				2015-02-11	1	1	1
				2015-02-12	1	1	1
				2015-02-13	1	1	1
				2015-02-14	1	1	1
				2015-02-15	1	1	1
				2015-02-16	1	1	1
				2015-02-17	1	1	1
				2015-02-18	1	1	1
				2015-02-19	1	1	1
				2015-02-20	1	1	1
				2015-02-21	1	1	1
				2015-02-22	1	1	1
				2015-02-23	1	1	1
				2015-02-24	1	1	1
				2015-02-25	1	1	1
				2015-02-26	1	1	1
				2015-02-27	1	1	1
				2015-02-28	1	1	1
				2015-03-01	1	1	1
				2015-03-02	1	1	1
				2015-03-03	1	1	1
				2015-03-04	1	1	1
				2015-03-05	1	1	1
				2015-03-06	1	1	1
				2015-03-07	1	1	1
				2015-03-08	1	1	1
				2015-03-09	1	1	1
				2015-03-10	1	1	1
				2015-03-11	1	1	1
				2015-03-12	1	1	1
				2015-03-13	1	1	1
				2015-03-14	1	1	1
				2015-03-15	1	1	1
				2015-03-16	1	1	1
				2015-03-17	1	1	1
				2015-03-18	1	1	1
				2015-03-19	1	1	1
				2015-03-20	1	1	1
				2015-03-21	1	1	1
				2015-03-22	1	1	1
				2015-03-23	1	1	1
				2015-03-24	1	1	1
				2015-03-25	1	1	1
				2015-03-26	1	1	1
				2015-03-27	1	1	1
				2015-03-28	1	1	1
				2015-03-29	1	1	1
				2015-03-30	1	1	1
				2015-03-31	1	1	1
				2015-04-01	1	1	1
				2015-04-02	1	1	1
				2015-04-03	1	1	1
				2015-04-04	1	1	1
				2015-04-05	1	1	1
				2015-04-06	1	1	1
				2015-04-07	1	1	1
				2015-04-08	1	1	1
				2015-04-09	1	1	1
				2015-04-10	1	1	1
				2015-04-11	1	1	1
				2015-04-12	1	1	1
				2015-04-13	1	1	1
				2015-04-14	1	1	1
				2015-04-15	1	1	1
				2015-04-16	1	1	1
				2015-04-17	1	1	1
				2015-04-18	1	1	1
				2015-04-19	1	1	1
				2015-04-20	1	1	1
				2015-04-21	1	1	1
				2015-04-22	1	1	1
				2015-04-23	1	1	1
				2015-04-24	1	1	1
				2015-04-25	1	1	1
				2015-04-26	1	1	1
				2015-04-27	1	1	1
				2015-04-28	1	1	1
				2015-04-29	1	1	1
				2015-04-30	1	1	1
				2015-05-01	1	1	1
				2015-05-02	1	1	1
				2015-05-03	1	1	1
				2015-05-04	1	1	1
				2015-05-05	1	1	1
				2015-05-06	1	1	1
				2015-05-07	1	1	1
				2015-05-08	1	1	1
				2015-05-09	1	1	1
				2015-05-10	1	1	1
				2015-05-11	1	1	1
				2015-05-12	1	1	1
				2015-05-13	1	1	1
				2015-05-14	1	1	1
				2015-05-15	1	1	1
				2015-05-16	1	1	1
				2015-05-17	1	1	1
				2015-05-18	1	1	1
				2015-05-19	1	1	1
				2015-05-20	1	1	1
				2015-05-21	1	1	1
				2015-05-22	1	1	1
				2015-05-23	1	1	1
				2015-05-24	1	1	1
				2015-05-25	1	1	1
				2015-05-26	1	1	1
				2015-05-27	1	1	1
				2015-05-28	1	1	1
				2015-05-29	1	1	1
				2015-05-30	1	1	1
				2015-05-31	1	1	1
				2015-06-01	1	1	1
				2015-06-02	1	1	1
				2015-06-03	1	1	1
				2015-06-04	1	1	1
				2015-06-05	1	1	1
				2015-06-06	1	1	1
				2015-06-07	1	1	1
				2015-06-08	1	1	1
				2015-06-09	1	1	1
				2015-06-10	1	1	1
				2015-06-11	1	1	1
				2015-06-12	1	1	1
				2015-06-13	1	1	1
				2015-06-14	1	1	1
				2015-06-15	1	1	1
				2015-06-16	1	1	1
				2015-06-17	1	1	1
				2015-06-18	1	1	1
				2015-06-19	1	1	1
				2015-06-20	1	1	1
				2015-06-21	1	1	1
				2015-06-22	1	1	1
[truncated: 1,653 more rows]
